# Supplementary material for: Hyperbranched polyether as an all-purpose epoxy modifier: controlled synthesis and toughening mechanisms
Source: Royal Society of Chemistry journal article supplement (doi:10.1039/c4ta04841e), 2014-10-20
Supplement: c4ta04841e1.pdf [file c4ta04841e1.pdf]

## For Table of Contents use only

### Hyperbranched polyether as all-purpose epoxy modifier: controlled synthesis and toughening mechanisms

Tuan Liu,<sup>a,b</sup> Yongxing Nie,<sup>b</sup> Liangdong Zhang,<sup>b</sup> Ruoshi Chen,<sup>a</sup> Yan Meng<sup>\*a</sup> and Xiaoyu Li<sup>\*b</sup>

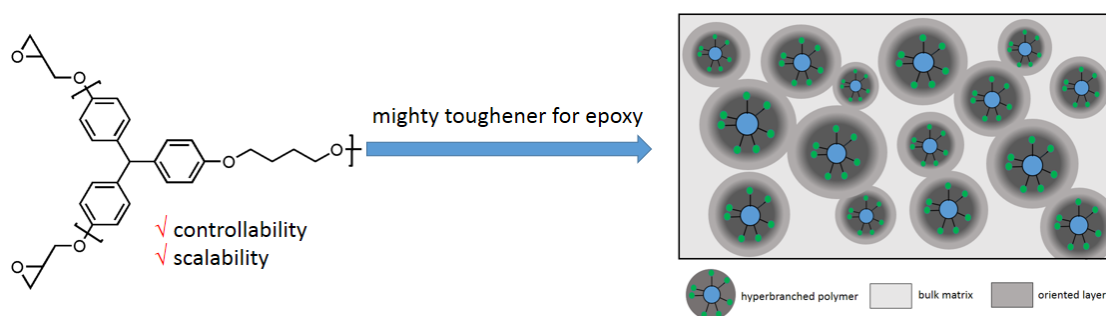

Non-phase-separated networks with simultaneous enhancements in  $T_g$ , impact strength, tensile strength, and modulus.
